# Supplementary material for: Loss of PI3Kα Mediates Protection From Myocardial Ischemia–Reperfusion Injury Linked to Preserved Mitochondrial Function
Source: PubMed Central journal article supplement — J Am Heart Assoc. 2023 Jun 15;12(12):e022352. doi: 10.1161/JAHA.122.022352 (PMC10356046; doi:10.1161/jaha.122.022352), 2023-06-15
Supplement: JAH3-12-e022352-s004.pdf [file JAH3-12-e022352-s004.pdf]

# **Supplemental Material**

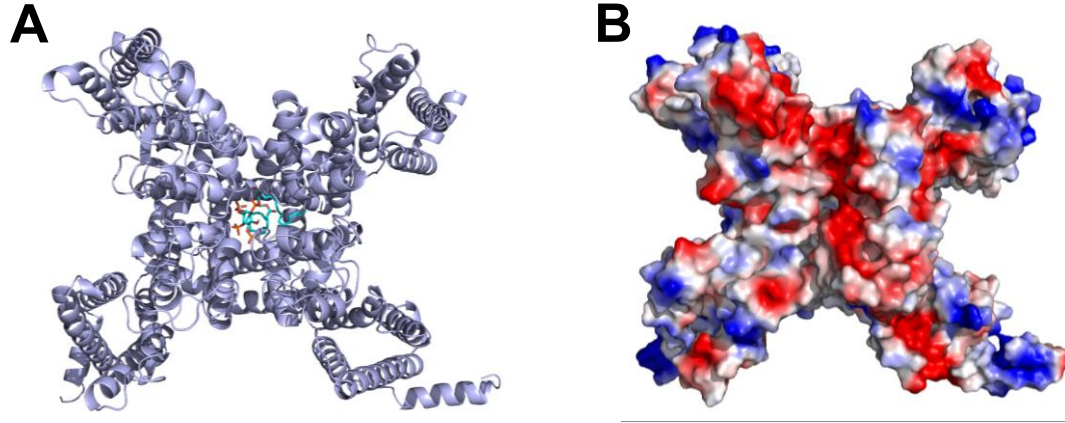

**Figure S1. Modeled structure and electrostatic potential surface of murine Nav 1.5 channel with phosphatidylinositol-3, 4, 5-triphosphate (PIP<sub>3</sub>).** **A.** Modeled structure of murine Nav 1.5 channel with PIP<sub>3</sub> (top view). **B.** Modeled electrostatic potential surface of murine Nav 1.5 channel with PIP<sub>3</sub>.

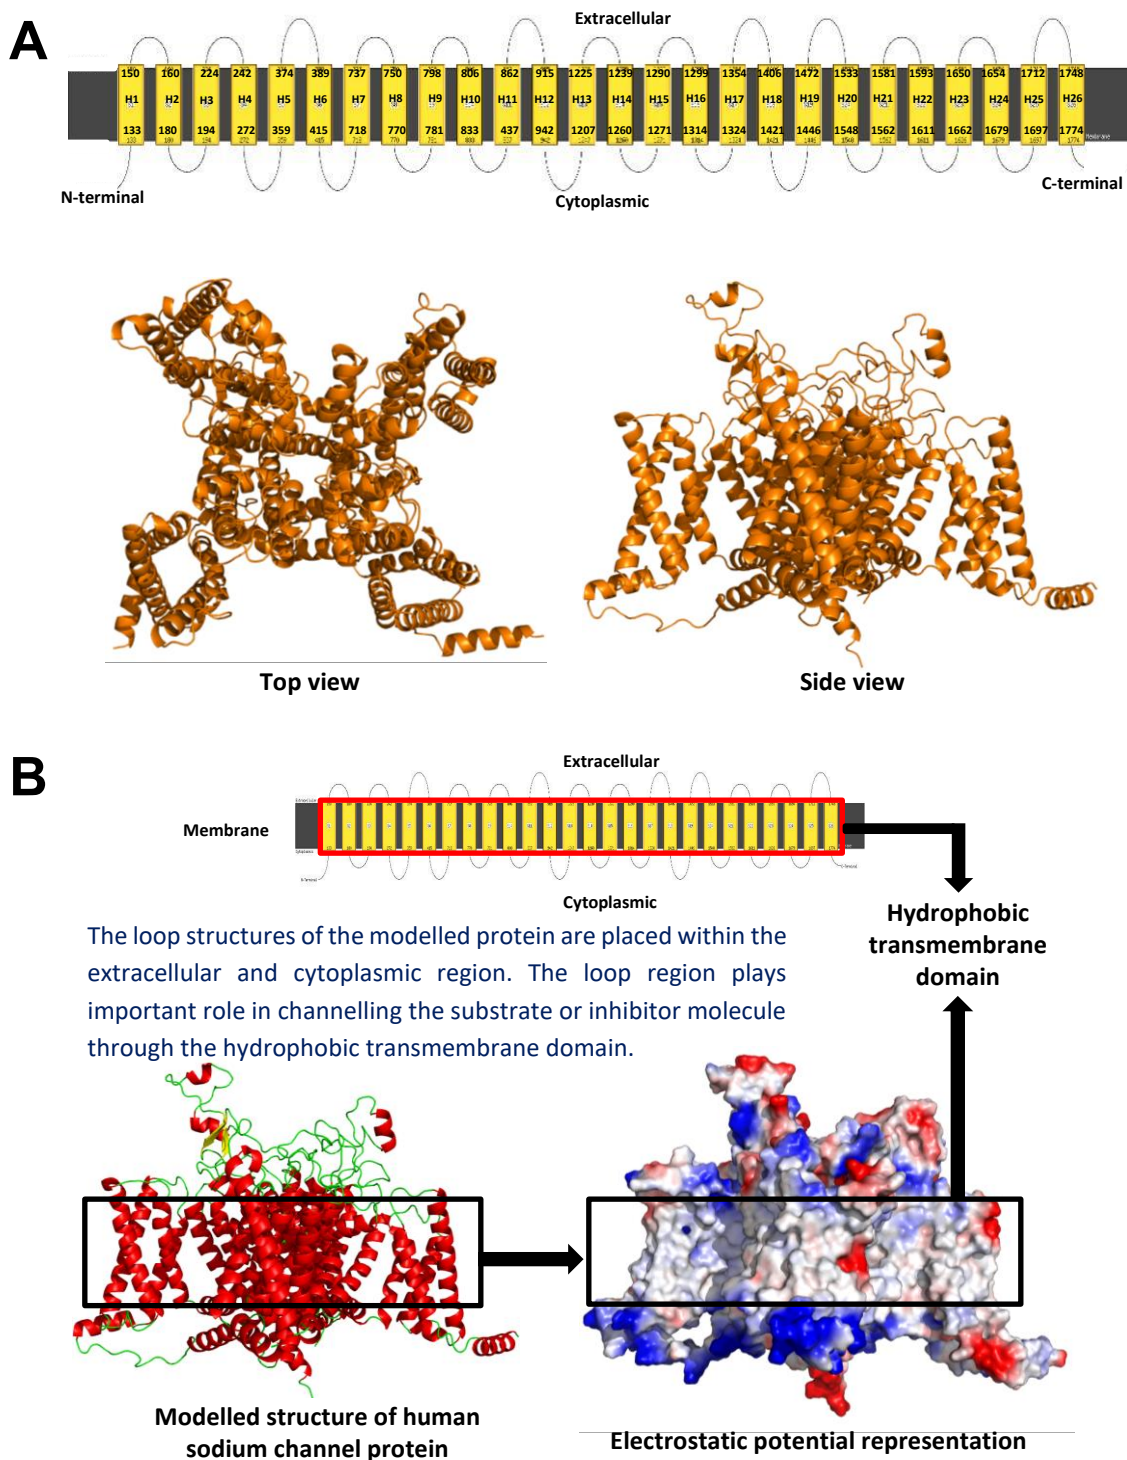

**Figure S2. Structure and domain architecture of modeled human Nav 1.5 channel. A.** Modeled structure of human Nav 1.5 channel. **B.** Domain architecture of modeled human Nav 1.5 channel.

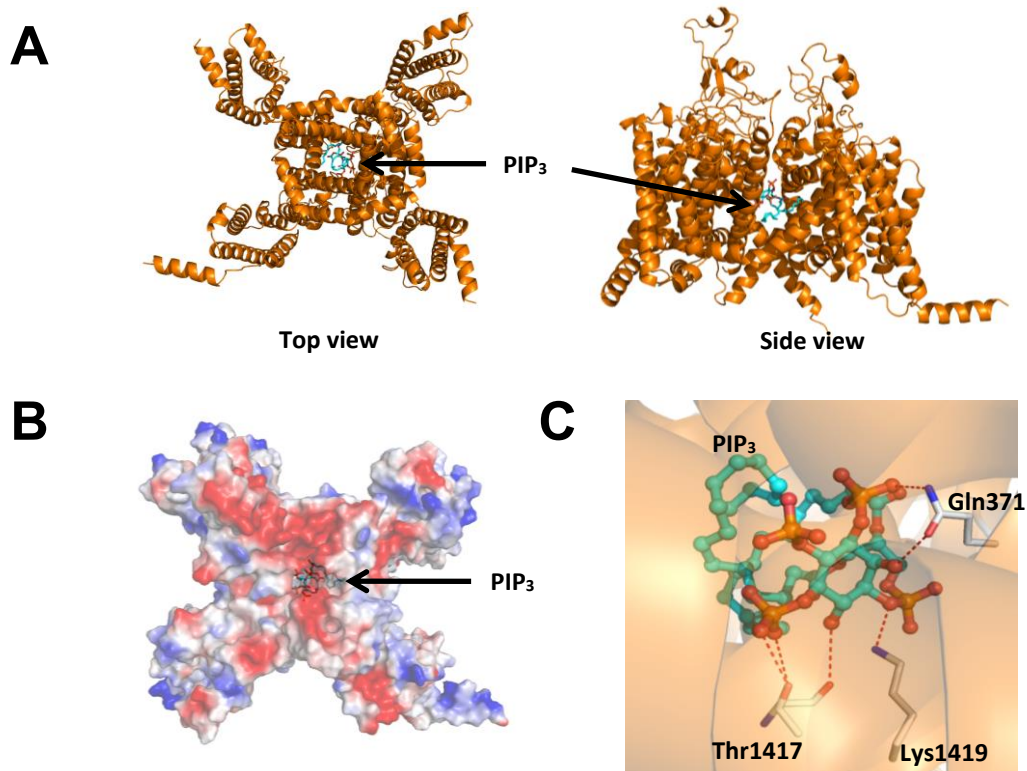

**Figure S3. Phosphatidylinositol-3, 4, 5-triphosphate (PIP<sub>3</sub>) interaction with human Nav 1.5.** **A.** Top and side view of human Nav 1.5 channel with PIP<sub>3</sub>. **B.** Electrostatic potential surface of the human Nav 1.5 channel (top view) with PIP<sub>3</sub>. **C.** Region of human Nav 1.5 channel interacting with PIP<sub>3</sub>. Gln, glutamine; Lys, lysine; Thr, threonine.

## **Supplemental Video Legends:**

**Video S1. Wild-type (WT) heart at baseline.** Pseudo-color video of epicardial imaging with voltage sensitive dye RH237. The 2-s recording of the post-stimulation interval at 50 frames/s. Acquisition frame rate 1,000 frames/s. Best viewed with Windows Media Player.

**Video S2. Wild-type (WT) heart at 1-min reperfusion.** Pseudo-color video of epicardial imaging with voltage sensitive dye RH237. The 2-s recording of the post-stimulation interval at 50 frames/s. Acquisition frame rate 1,000 frames/s. Best viewed with Windows Media Player.

**Video S3. p110 $\alpha$ -DN (constituent PI3K $\alpha$ -deficient) heart at baseline.** Pseudo-color video of epicardial imaging with voltage sensitive dye RH237. The 2-s recording of the post-stimulation interval at 50 frames/s. Acquisition frame rate 1,000 frames/s. Best viewed with Windows Media Player.

**Video S4. p110 $\alpha$ -DN (constituent PI3K $\alpha$ -deficient) heart at 1-min reperfusion.** Pseudo-color video of epicardial imaging with voltage sensitive dye RH237. The 2-s recording of the post-stimulation interval at 50 frames/s. Acquisition frame rate 1,000 frames/s. Best viewed with Windows Media Player.
